# Supplementary material
Source: publisher figshare collection journal article supplement (https://gsajournals.figshare.com/ndownloader/files/15253571)
Supplement: Supplementary file 1 [file 15253571]

Fig. S3

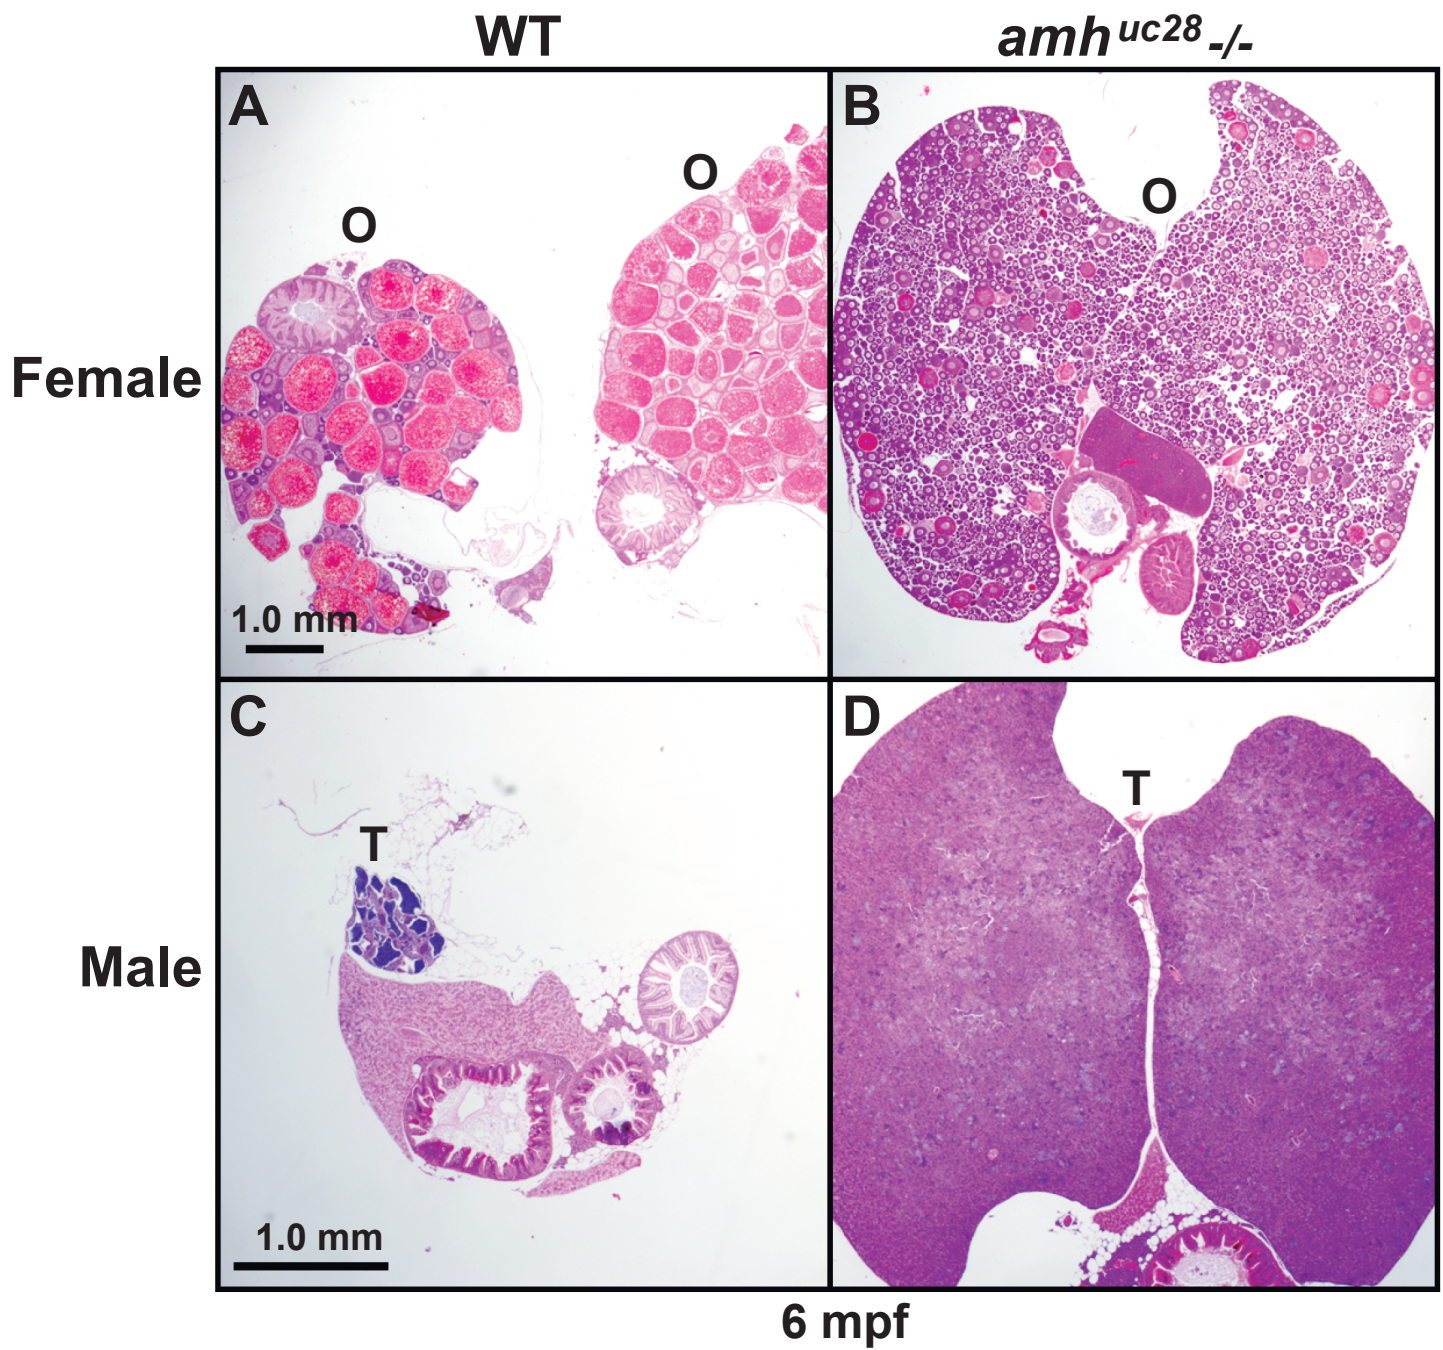

Supplemental Figure S3. Gonadal phenotypes of the *amh<sup>uc28</sup>* allele visualized in hematoxylin and eosin stained histological sections of 6mpf animals. A. Wild-type (WT) female. B. *amh<sup>uc28</sup>* mutant female. C. Wild-type male. D. *amh<sup>uc28</sup>* mutant male. Abbreviations: O, ovary; T, testis. Scale bar: 1mm.
